# Supplementary material for: Predicting time to relapse in patients with schizophrenia according to patients’ relapse history: a historical cohort study using real-world data in Sweden
Source: Springer Nature journal article supplement (doi:10.1186/s12888-021-03634-z), 2021-12-01
Supplement: MOESM3 [file 19972124]

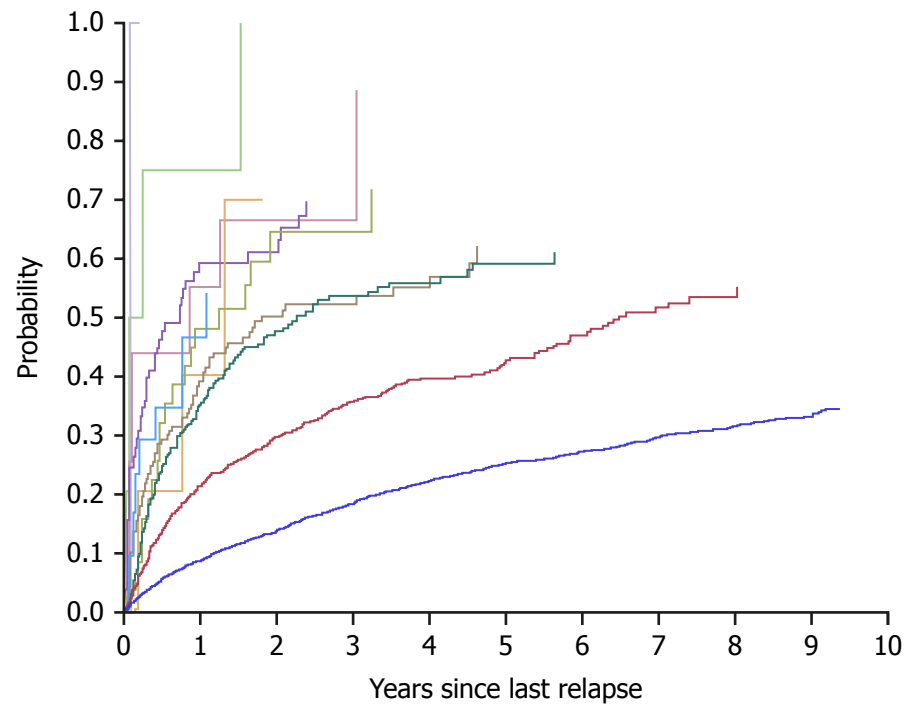

Number of prior relapses

|     |     |     |     |      |     |
|-----|-----|-----|-----|------|-----|
| — 0 | — 1 | — 2 | — 3 | — 4  | — 5 |
| — 6 | — 7 | — 8 | — 9 | — 10 |     |
