# Supplementary material for: Predicting time to relapse in patients with schizophrenia according to patients’ relapse history: a historical cohort study using real-world data in Sweden
Source: Springer Nature journal article supplement (doi:10.1186/s12888-021-03634-z), 2021-12-01

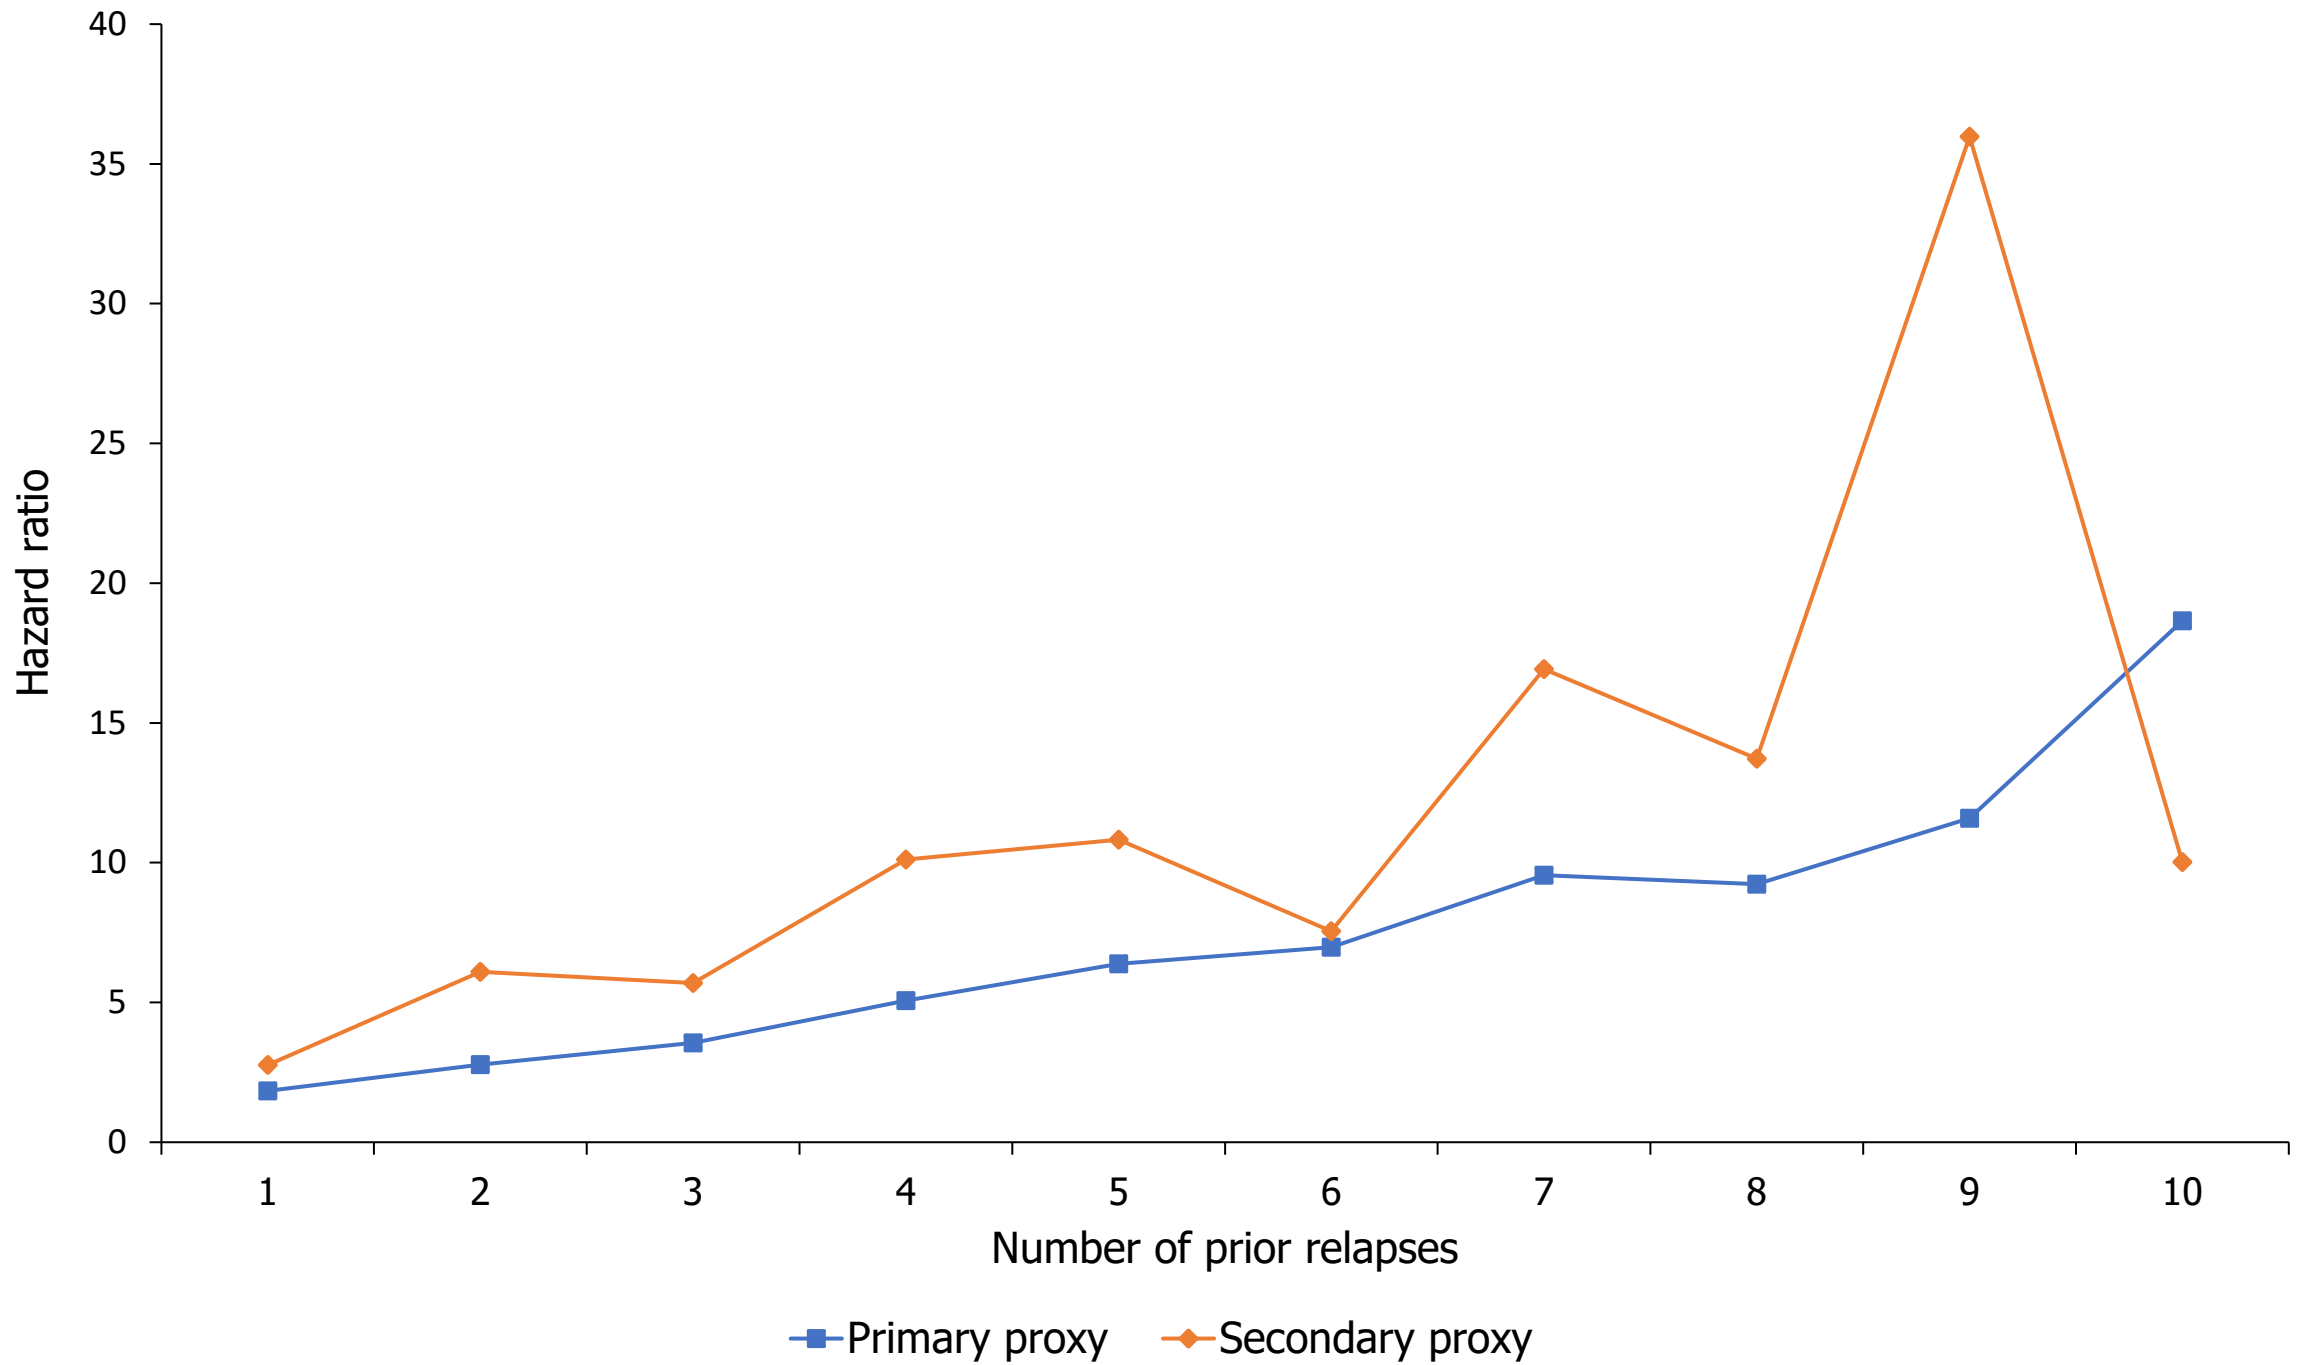

Supplement: MOESM5 [file 19972124]
